# Supplementary material for: Effects of the temperature and trehalose concentration on the hydrophobic interactions of a small nonpolar neopentane solute: a molecular dynamics simulation study
Source: Royal Society of Chemistry journal article supplement (doi:10.1039/c4ra03678f), 2014-07-16
Supplement: c4ra03678f1.pdf [file c4ra03678f1.pdf]

## Supporting Material

### Effects of temperature and trehalose concentration on hydrophobic interactions of small nonpolar neopentane solute: Molecular dynamics simulation study

Subrata Paul and Sandip Paul

*Department of Chemistry, Indian Institute of Technology, Guwahati Assam, India-781039*

(Dated: June 26, 2014)

| Systems                            | 285K | 300K | 315K | 330K | 345K |
|------------------------------------|------|------|------|------|------|
| $D_{np}$ ( $10^{-5} cm^2 s^{-1}$ ) |      |      |      |      |      |
| S0                                 | 0.08 | 0.08 | 0.37 | 0.34 | 0.52 |
| S1                                 | 0.04 | 0.17 | 0.38 | 0.25 | 0.43 |
| S2                                 | 0.06 | 0.06 | 0.06 | 0.11 | 0.27 |
| S3                                 | 0.03 | 0.02 | 0.03 | 0.04 | 0.08 |
| S4                                 | 0.04 | 0.04 | 0.04 | 0.03 | 0.08 |
| S5                                 | 0.03 | 0.03 | 0.13 | 0.07 | 0.09 |

TABLE I: Diffusion coefficients of neopentane ( $D_{np}$ ).

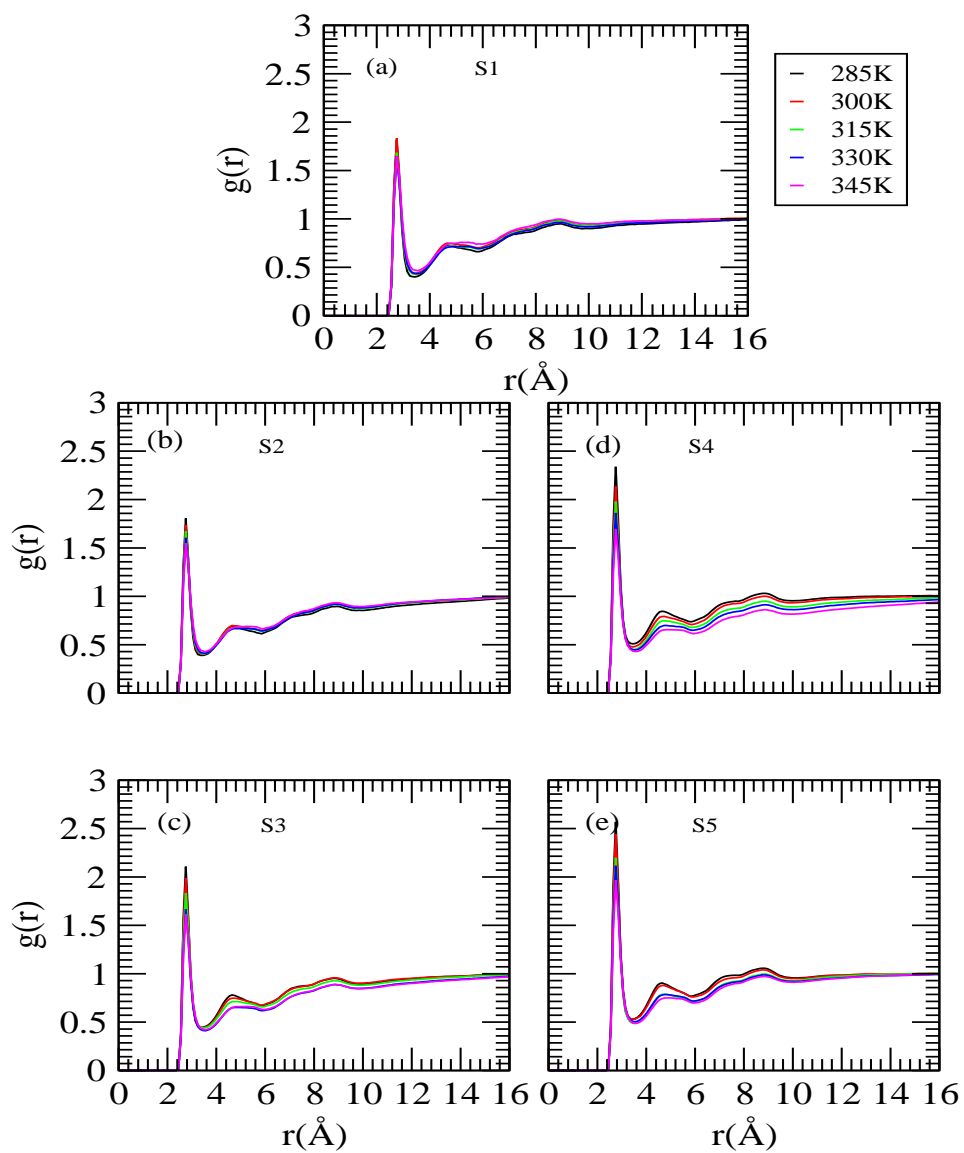

FIG. 1: Site-site radial distribution functions involving water oxygen and trehalose hydroxylic oxygen (O2).

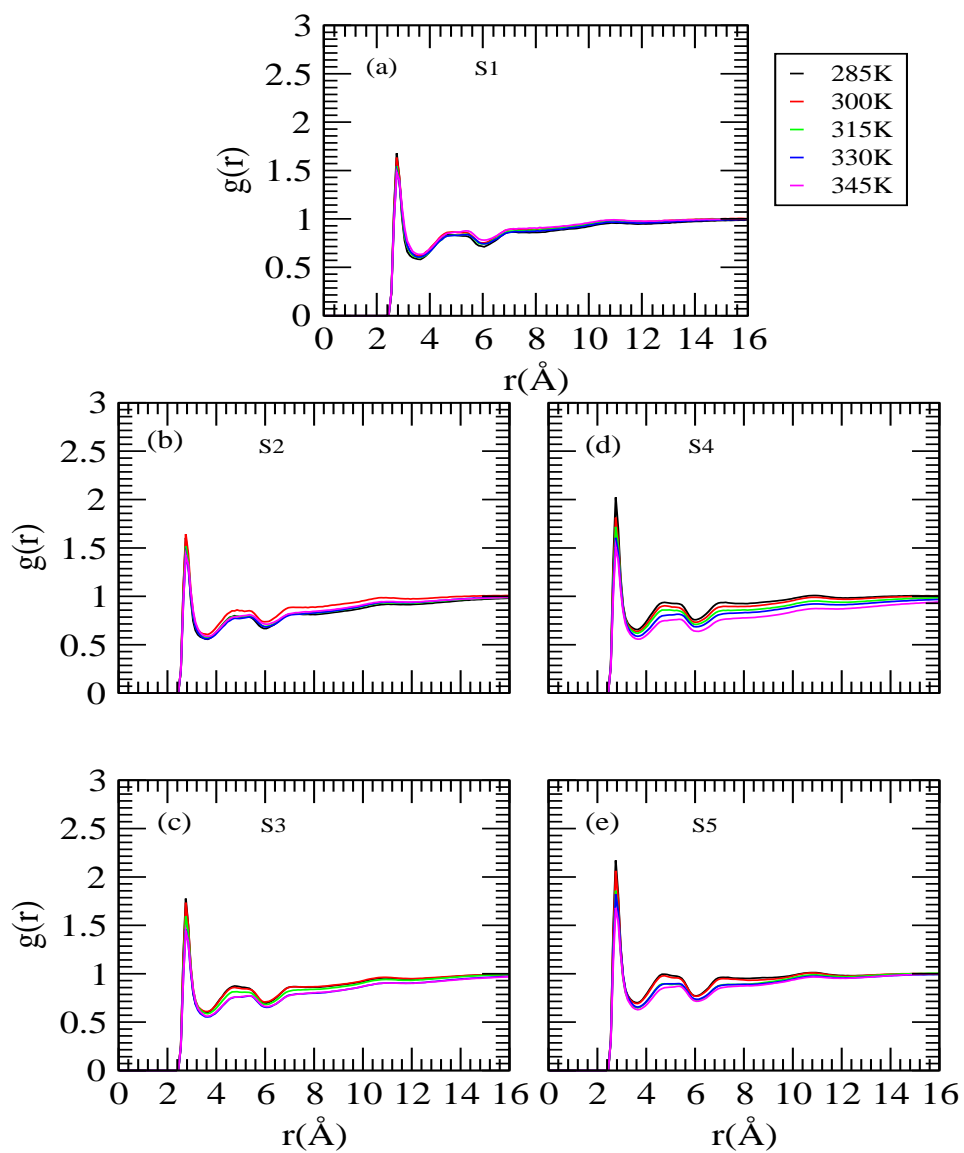

FIG. 2: Site-site radial distribution functions involving water oxygen and trehalose hydroxylic oxygen (O3).

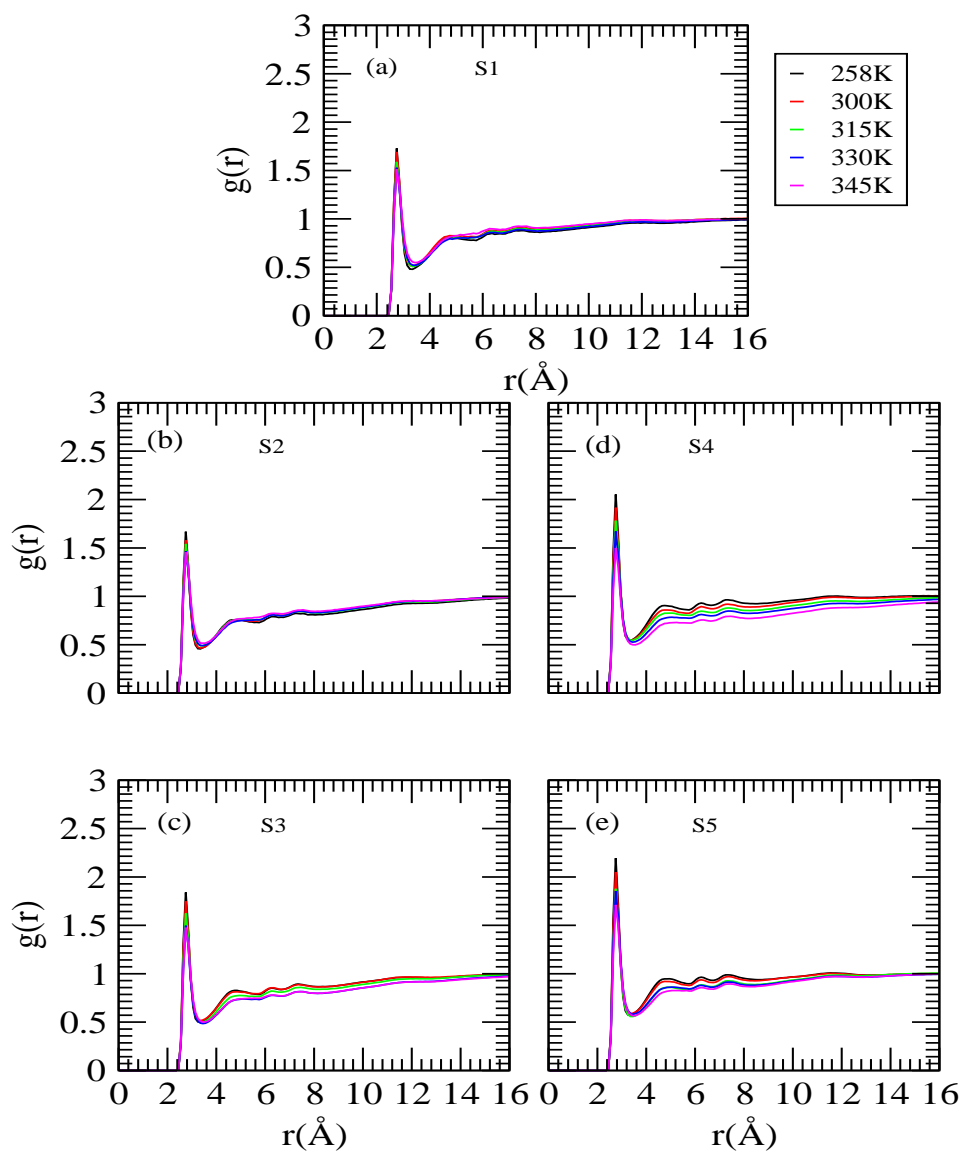

FIG. 3: Site-site radial distribution functions involving water oxygen and trehalose hydroxylic oxygen (O4).

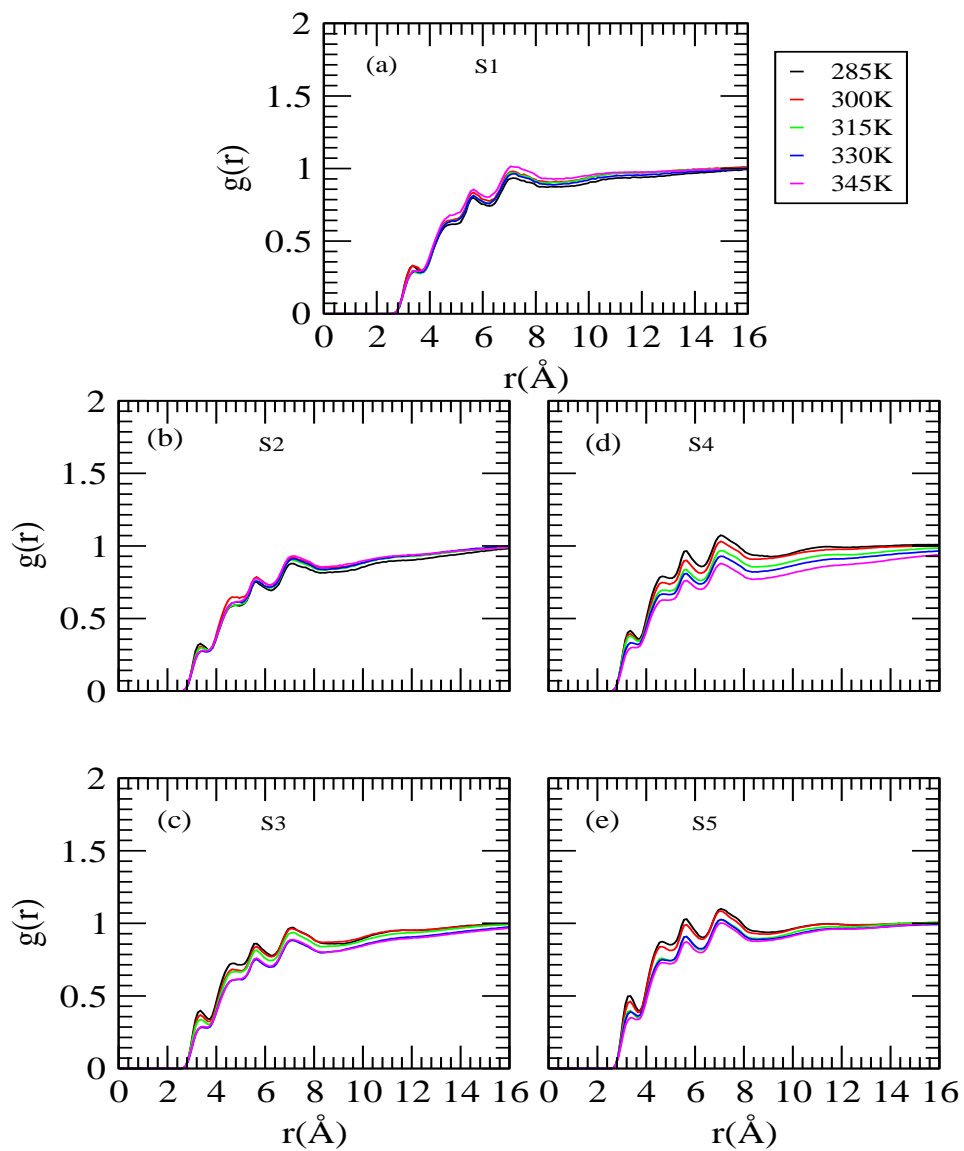

FIG. 4: Site-site radial distribution functions involving water oxygen and trehalose glycosidic oxygen (O1).

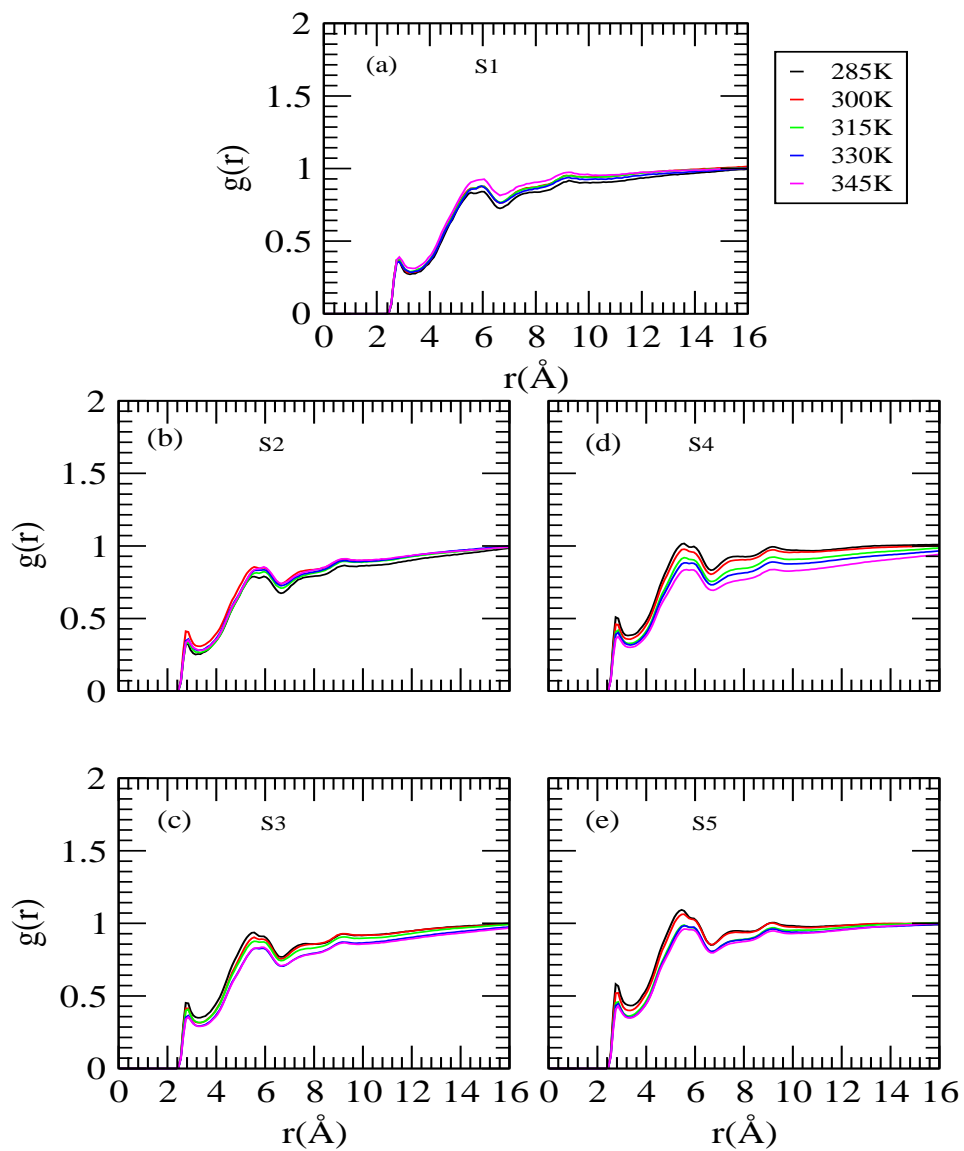

FIG. 5: Site-site radial distribution functions involving water oxygen and trehalose acetalic ring oxygen (O5).

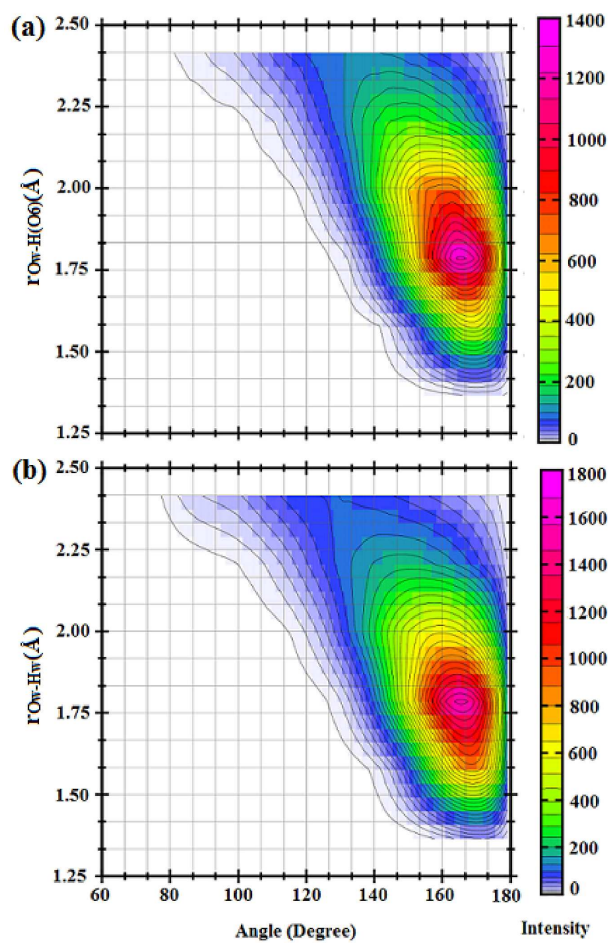

FIG. 6: Probability distribution contour plots as a function of hydrogen bond angle (D-H-A) and acceptor-hydrogen (A-H) distance for system S5 at 300K (a) is for water oxygen-trehalose hydrogen and (b) is for water oxygen-water hydrogen H-bond.



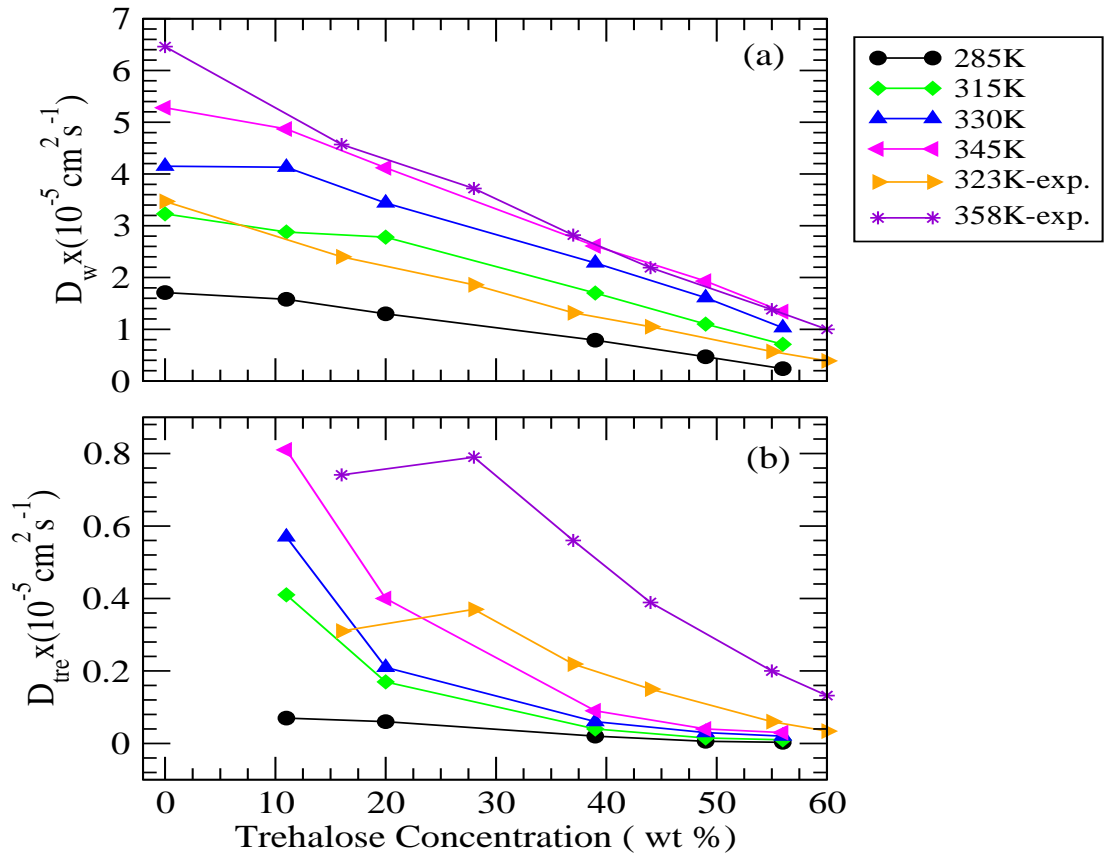

FIG. 7: Diffusion coefficient of (a) water and (b) trehalose for different systems at 285 K, 315 K, 330 K and 345 K temperatures. The experimental diffusion coefficient values are taken from Reference 73 of the main manuscript.

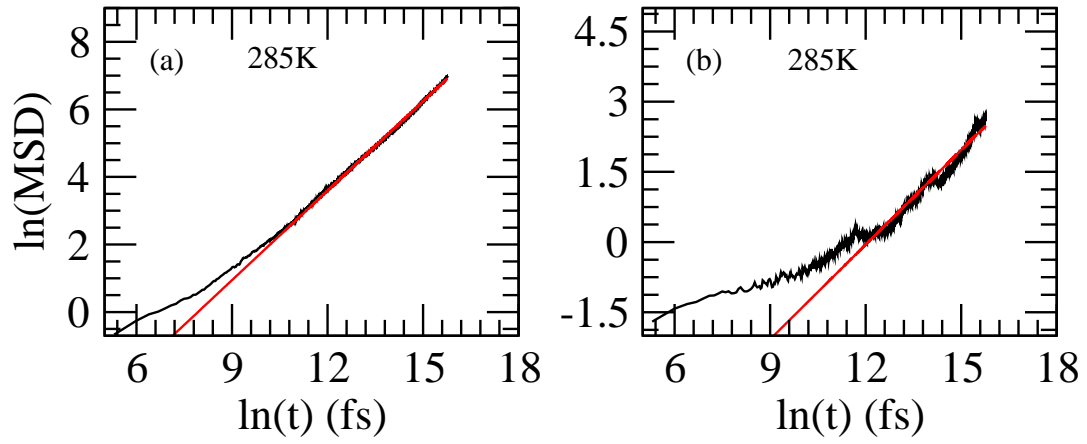

FIG. 8: Black line represents log-log plot of mean-squared displacement (MSD) vs. time for (a) water and (b) trehalose for system S5 at temperature 285 K. The slope of the curve becomes unity once the molecules reach the diffusive regime. The red line has unit slope.
